# Supplementary material
Source: publisher figshare collection journal article supplement (https://gsapubs.figshare.com/ndownloader/files/23319689)
Supplement: Supplementary file 1 [file 23319689]

## Sheet: Sheet1
TABLE DR9. SINGLE GRAIN STEP-HEATING 40AR/39AR DATA
ID	Power (Watts)	40Ar/39Ar	37Ar/39Ar	36Ar/39Ar (x 10-3)	39ArK (x 10-15 mol)	K/Ca	40Ar* (%)	39Ar (%)	Age (Ma)	±1σ (Ma)
CM-SS4, Sanidine, J=0.009546±0.12%, IC=1.058206±0.0009102, NM-254E, Lab#=61414-04, Argus VI
A	0.1	4.07288	0.0046565	0.0148	7.87838	109.568	99.9007	27.228	69.6171	0.0216042
B	0.2	4.06673	0.0040735	0.0031591	7.45182	125.25	99.9848	52.9817	69.5711	0.0227631
C	0.3	4.08031	0.004381	-0.000797018	9.95001	116.458	100.014	87.3693	69.8199	0.0171503
D	0.5	4.09494	0.0037424	0.0135	2.5342	136.331	99.908	96.1275	69.9928	0.0568641
E	3	4.07086	0.0056923	0.0454	1.12049	89.6306	99.6766	100	69.43	0.130699
Integrated age ± 1s			n=5		28.9349				69.7009	0.0861517
Plateau ± 1s		steps A-E	n=5	MSWD=31.51	28.9349			100	69.7072	0.106248
CM-SS4, Sanidine, J=0.009546±0.12%, IC=1.058206±0.0009102, NM-254E, Lab#=61414-05, Argus VI
A	0.1	4.29766	0.0091569	0.0247	1.10943	55.718	99.846	6.09052	73.3515	0.126968
B	0.2	4.36789	0.0041239	0.00398516	8.53605	123.719	99.9802	52.9517	74.6263	0.0192103
C	0.3	4.38437	0.0049936	0.00983582	4.37272	102.172	99.9417	76.957	74.8744	0.035844
D	0.5	4.39188	0.0047663	0.00472811	3.42101	107.044	99.9759	95.7377	75.0255	0.0430664
E	3	4.39741	0.005196	0.0692	0.77641	98.1917	99.5401	100	74.7973	0.176451
Integrated age ± 1s			n=5		18.2156				74.6909	0.0930489
Plateau ± 1s		steps B-E	n=4	MSWD=30.86	17.1062			93.9095	74.7283	0.126227
CM-SS4, Sanidine, J=0.009546±0.12%, IC=1.058206±0.0009102, NM-254E, Lab#=61414-06, Argus VI
A	0.1	4.35978	0.0042784	0.00355926	5.83579	119.251	99.9835	40.4585	74.4926	0.0271428
B	0.15	4.35674	0.0031619	-0.00642704	1.85918	161.36	100.049	53.3479	74.4893	0.0779035
C	0.3	4.36625	0.0055132	-0.00216922	3.25037	92.5423	100.025	75.8821	74.6316	0.0447781
D	0.6	4.37497	0.0047431	0.0103	3.08346	107.568	99.9384	97.2593	74.7144	0.0479081
E	3	4.06489	0.0112106	0.0904	0.395329	45.5109	99.3585	100	69.1131	0.337811
Integrated age ± 1s			n=5		14.4241				74.4239	0.0936787
Plateau ± 1s		steps A-D	n=4	MSWD=6.64	14.0288			97.2593	74.5599	0.104874
CM-SS4, Sanidine, J=0.009546±0.12%, IC=1.058206±0.0009102, NM-254E, Lab#=61414-07, Argus VI
A	0.1	4.33417	0.0043986	0.0434	2.07744	115.992	99.7091	12.2877	73.8637	0.0658455
B	0.15	4.33466	0.003704	0.0046816	6.94954	137.744	99.9749	53.3929	74.0648	0.0236049
C	0.3	4.34881	0.0046585	0.00513175	2.38472	109.521	99.973	67.4981	74.3009	0.0585263
D	0.6	4.35949	0.0036944	-0.00456851	4.84419	138.102	100.038	96.1506	74.5274	0.0308097
E	3	4.40718	0.0003764	0.0577	0.650807	1355.48	99.6081	100	75.0104	0.204974
Integrated age ± 1s			n=5		16.9067				74.2427	0.0926893
Plateau ± 1s		steps A-E	n=5	MSWD=47.20	16.9067			100	74.2217	0.148748
CM-SS4, Sanidine, J=0.009546±0.12%, IC=1.058206±0.0009102, NM-254E, Lab#=61414-08, Argus VI
A	0.1	3.96927	0.0105131	0.0556	0.260771	48.5303	99.6078	0.705443	67.6801	0.511997
B	0.15	4.35848	0.0055532	0.00820157	6.42567	91.8757	99.9541	18.0883	74.4494	0.0245282
C	0.3	4.33067	0.0042725	-0.000554766	10.1795	119.416	100.012	45.6259	74.0247	0.0177642
D	0.5	4.34081	0.0042596	0.00312751	9.81984	119.777	99.9864	72.1907	74.1765	0.0167567
E	3	4.33853	0.0040565	0.00524222	10.2799	125.774	99.9714	100	74.1274	0.0172948
Integrated age ± 1s			n=5		36.9656				74.1229	0.0910972
Plateau ± 1s		steps A-E	n=5	MSWD=90.45	36.9656			100	74.1581	0.126145
CM-SS4, Sanidine, J=0.009546±0.12%, IC=1.058206±0.0009102, NM-254E, Lab#=61414-09, Argus VI
A	0.1	4.41583	0.0050218	0.0101	1.25014	101.598	99.94	11.5593	75.4004	0.110936
B	0.15	4.3751	0.0043816	-0.00260162	3.65747	116.442	100.025	45.3779	74.7799	0.0396848
C	0.3	4.38456	0.0043778	-0.000613823	4.40778	116.543	100.012	86.1343	74.9291	0.0330748
D	0.5	4.40687	0.003816	0.0235	0.770596	133.701	99.8483	93.2595	75.1826	0.175642
E	3	3.92783	0.0015864	0.1627	0.728978	321.611	98.7657	100	66.4282	0.193579
Integrated age ± 1s			n=5		10.815				74.38	0.0954034
Plateau ± 1s		steps A-D	n=4	MSWD=10.95	10.086			93.2595	74.9001	0.122303
CM-SS4, Sanidine, J=0.009546±0.12%, IC=1.058206±0.0009102, NM-254E, Lab#=61414-10, Argus VI
A	0.1	4.45268	0.0038874	0.0264	1.53457	131.246	99.8301	7.19453	75.9359	0.0912762
B	0.15	4.33002	0.0031307	0.00511117	10.2381	162.968	99.9705	55.1937	73.9839	0.0171831
C	0.3	4.33777	0.0037645	0.00370831	4.11771	135.53	99.9806	74.4988	74.1212	0.0358434
D	0.5	4.36606	0.0050917	0.031	1.08122	100.203	99.7973	79.5679	74.4619	0.120104
E	3	4.35518	0.0046154	0.0107	4.3581	110.544	99.934	100	74.3794	0.0346629
Integrated age ± 1s			n=5		21.3297				74.2563	0.0920539
Plateau ± 1s		steps B-E	n=4	MSWD=39.09	19.7951			92.8055	74.0765	0.126118
CM-SS4, Sanidine, J=0.009546±0.12%, IC=1.058206±0.0009102, NM-254E, Lab#=61414-11, Argus VI
A	0.1	4.53491	0.0057314	0.0298	0.895857	89.0191	99.812	6.1741	77.2979	0.14577
B	0.15	4.64357	-0.017647	0.2542	0.225414	-	98.3338	7.72761	77.9655	2.06946
C	0.3	4.41094	0.0051339	0.000755352	7.37409	99.3794	100.004	58.5486	75.3659	0.0213379
D	0.5	4.41962	0.0048681	-0.000740354	3.60698	104.806	100.013	83.4073	75.518	0.0391553
E	3	4.42551	0.0052094	0.00439038	2.40759	97.9391	99.9786	100	75.5913	0.0582581
Integrated age ± 1s			n=5		14.5099				75.6011	0.0995541
Plateau ± 1s		steps B-E	n=4	MSWD=7.61	13.6141			93.8259	75.4188	0.104426
CM-SS4, Sanidine, J=0.009546±0.12%, IC=1.058206±0.0009102, NM-254E, Lab#=61414-12, Argus VI
A	0.1	4.39965	0.0050167	0.00578375	1.09741	101.701	99.9715	4.72088	75.1525	0.118782
B	0.15	4.30039	0.0040201	0.00282236	9.73111	126.913	99.988	46.5826	73.4993	0.0163625
C	0.3	4.31284	0.0049906	0.00118896	2.82682	102.233	100	58.7431	73.717	0.0507567
D	0.5	4.32024	0.0034505	0.005346	2.70683	147.864	99.9683	70.3874	73.8182	0.0519531
E	3	4.316	0.0040194	0.0208	6.8837	126.935	99.8634	100	73.6712	0.0229187
Integrated age ± 1s			n=5		23.2459				73.6922	0.0911325
Plateau ± 1s		steps B-E	n=4	MSWD=22.83	22.1485			95.2791	73.5821	0.107943
CM-SS4, Sanidine, J=0.009546±0.12%, IC=1.058206±0.0009102, NM-254E, Lab#=61414-13, Argus VI
A	0.1	4.19867	0.0063631	0.0234	0.461205	80.1817	99.8473	3.35575	71.6923	0.279064
B	0.15	4.03476	0.0039259	0.00341113	6.03726	129.958	99.9824	47.2831	69.0317	0.0246851
C	0.3	4.02733	0.0050131	-0.0106	1.74994	101.774	100.089	60.0157	68.9785	0.0751872
D	0.5	4.04432	0.0042895	0.0127	1.0345	118.943	99.9137	67.5428	69.1458	0.125473
E	3	4.0541	0.0042117	0.0102	4.46082	121.14	99.9323	100	69.323	0.0321937
Integrated age ± 1s			n=5		13.7437				69.2176	0.0875219
Plateau ± 1s		steps B-E	n=4	MSWD=18.62	13.2825			96.6442	69.1297	0.117026
CM-SS4, Sanidine, J=0.009546±0.12%, IC=1.058206±0.0009102, NM-254E, Lab#=61414-14, Argus VI
A	0.1	4.60922	-0.0011987	-0.0855	0.244341	-	100.568	1.2058	79.1217	2.18848
B	0.15	4.36478	0.0045471	0.0137	3.15121	112.204	99.9146	16.7568	74.526	0.045587
C	0.3	4.34755	0.0044238	0.00209082	5.18866	115.332	99.9933	42.3624	74.2946	0.0283524
D	0.5	4.35425	0.0042372	0.00561007	5.38154	120.411	99.9691	68.9199	74.3893	0.0291582
E	3	4.3343	0.0040505	0.0124	6.298	125.961	99.9221	100	74.0206	0.0254463
Integrated age ± 1s			n=5		20.2638				74.3291	0.0955631
Plateau ± 1s		steps C-E	n=3	MSWD=50.97	16.8682			83.2432	74.2159	0.14518
CM-SS4, Sanidine, J=0.009546±0.12%, IC=1.058206±0.0009102, NM-254E, Lab#=61414-15, Argus VI
A	0.1	4.36871	0.051949	-0.7116	0.148364	9.82125	104.923	0.520791	78.2545	3.41983
B	0.15	4.10092	0.0043167	0.000290071	2.96212	118.193	100.005	10.9185	70.1604	0.0458005
C	0.3	4.06312	0.0041447	0.0041279	11.0573	123.098	99.9776	49.732	69.5055	0.0151624
D	0.5	4.06174	0.0048481	0.00680593	5.81708	105.238	99.9589	70.1513	69.4695	0.025076
E	3	4.10391	0.0047312	0.0395	8.50339	107.838	99.7218	100	70.0152	0.0206474
Integrated age ± 1s			n=5		28.4883				69.7645	0.0876975
Plateau ± 1s		steps A-E	n=5	MSWD=145.54	28.4883			100	69.6711	0.154503
CM-SS4, Sanidine, J=0.009546±0.12%, IC=1.058206±0.0009102, NM-254E, Lab#=61414-16, Argus VI
A	0.1	10.5772	-0.702951	8.9005	0.00923404	-	74.4424	0.138449	132.503	52.5947
B	0.15	7.1132	0.0212685	0.0432	0.327519	23.9887	99.8414	5.04906	119.943	1.46286
C	0.3	13.5975	0.0010457	-0.00532151	5.45984	487.907	100.012	86.9105	223.298	1.08482
D	0.5	12.7016	-0.0015854	0.1931	0.318522	-	99.5333	91.6862	208.439	2.57052
E	3	12.4217	0.006028	0.1085	0.554496	84.639	99.746	100	204.503	1.83947
Integrated age ± 1s			n=5		6.66961				215.966	0.931428
Plateau ± 1s		steps D-E	n=2	MSWD=1.55	0.873018			13.0895	205.836	1.87833
CM-SS4, Sanidine, J=0.009546±0.12%, IC=1.058206±0.0009102, NM-254E, Lab#=61414-17, Argus VI
B	0.15	4.37241	0.0056362	-0.0131	0.560597	90.5227	100.098	9.92592	74.788	0.222471
C	0.3	4.33967	0.0048058	0.0124	2.87314	106.164	99.9234	60.7976	74.1116	0.0486645
D	0.5	4.35929	0.0023847	0.0324	0.936685	213.949	99.7807	77.3825	74.3362	0.135242
E	3	4.28162	0.004851	0.0207	1.27739	105.175	99.8647	100	73.0959	0.102097
Integrated age ± 1s			n=4		5.64781				73.987	0.101408
Plateau ± 1s		steps B-E	n=4	MSWD=34.12	5.64781			100	73.9911	0.25633
CM-SS4, Sanidine, J=0.009546±0.12%, IC=1.058206±0.0009102, NM-254E, Lab#=61414-18, Argus VI
A	0.1	-0.927278	0.0257546	5.7486	0.00678386	19.8102	284.273	0.040344	-47.0627	65.6425
B	0.15	4.54925	0.0040088	-0.4484	0.169769	127.271	102.96	1.04997	79.9307	3.15242
C	0.3	4.40438	0.0034099	0.00640413	8.44837	149.624	99.9628	51.2929	75.2252	0.0191087
D	0.5	4.41249	0.0032273	-0.00802284	2.03536	158.09	100.058	63.3974	75.4316	0.0650981
E	3	4.39405	0.0039925	0.00899024	6.15474	127.791	99.9459	100	75.0398	0.0245313
Integrated age ± 1s			n=5		16.815				75.1823	0.10167
Plateau ± 1s		steps A-E	n=5	MSWD=14.61	16.815			100	75.1694	0.107609
CM-SS4, Sanidine, J=0.009546±0.12%, IC=1.058206±0.0009102, NM-254E, Lab#=61414-19, Argus VI
A	0.1	3.99667	0.0032391	0.0206	3.34872	157.514	99.8509	25.4563	68.3025	0.0410878
B	0.15	3.97646	0.0033469	0.00103174	7.27526	152.441	99.999	80.7613	68.0617	0.0213522
C	0.3	3.99861	0.0049827	0.0133	1.42835	102.395	99.9092	91.6193	68.3743	0.0973662
D	3	4.02726	0.0049195	0.0572	1.10246	103.711	99.5852	100	68.6369	0.171833
Integrated age ± 1s			n=4		13.1548				68.2057	0.0867654
Plateau ± 1s		steps A-D	n=4	MSWD=14.29	13.1548			100	68.1284	0.108783
CM-SS4, Sanidine, J=0.009546±0.12%, IC=1.058206±0.0009102, NM-254E, Lab#=61414-20, Argus VI
A	0.1	94.7499	0.059852	0.6422	0.121864	8.52443	99.8041	4.00222	1177.48	19.3352
B	3	108.869	0.0023328	-0.00902469	2.92305	218.709	100.003	100	1304.35	0.357714
Integrated age ± 1s			n=2		3.04492				1299.44	1.46592
Plateau ± 1s		no plateau
CM-SS4, Sanidine, J=0.009546±0.12%, IC=1.058206±0.0009102, NM-254E, Lab#=61414-21, Argus VI
A	0.1	3.05429	0.0073268	0.2151	0.252687	69.6353	97.9163	1.54723	51.3922	0.479675
B	0.15	4.49769	0.0075545	0.1118	0.358142	67.5364	99.2697	3.74018	76.2675	0.355501
C	0.3	4.39361	0.0052659	-0.000324634	8.70235	96.8883	100.012	57.0258	75.0809	0.018624
D	0.5	4.39116	0.0052633	0.0178	1.28982	96.9361	99.8864	64.9235	74.9476	0.100731
E	3	4.40924	0.0045441	0.00703067	5.72853	112.278	99.9606	100	75.3051	0.0381008
Integrated age ± 1s			n=5		16.3315				74.8112	0.0938275
Plateau ± 1s		steps C-E	n=3	MSWD=15.47	15.7207			96.2598	75.1194	0.112396
CM-SS4, Sanidine, J=0.009546±0.12%, IC=1.058206±0.0009102, NM-254E, Lab#=61414-22, Argus VI
A	0.1	4.73876	-0.0335108	0.4589	0.120142	-	97.0811	1.64343	78.5397	2.88524
B	3	4.46177	0.0057993	0.00459036	7.19029	87.9768	99.9796	100	76.1998	0.024832
Integrated age ± 1s			n=2		7.31043				76.2388	0.106981
Plateau ± 1s		steps A-B	n=2	MSWD=0.66	7.31043			100	76.2	0.0962971
CM-SS4, Sanidine, J=0.009546±0.12%, IC=1.058206±0.0009102, NM-254E, Lab#=61414-23, Argus VI
A	0.1	4.35626	0.0041294	0.0264	2.69759	123.554	99.83	51.2442	74.3216	0.29777
B	3	4.35898	0.0032959	0.00136425	2.56659	154.8	99.9974	100	74.4892	0.0567803
Integrated age ± 1s			n=2		5.26417				74.4037	0.179692
Plateau ± 1s		steps A-B	n=2	MSWD=0.31	5.26417			100	74.4833	0.106722
CM-SS4, Sanidine, J=0.009546±0.12%, IC=1.058206±0.0009102, NM-254E, Lab#=61414-24, Argus VI
A	0.1	4.48973	0.0099294	0.0449	1.59469	51.3832	99.7176	25.9467	76.4717	0.341463
B	3	4.4591	0.007071	0.0133	4.55134	72.1544	99.9232	100	76.1131	0.037358
Integrated age ± 1s			n=2		6.14603	65.3045			76.207	0.131109
Plateau ± 1s		steps A-B	n=2	MSWD=1.09	6.14603	66.765±14.688		100	76.1173	0.100704
CM-SS4, Sanidine, J=0.009546±0.12%, IC=1.058206±0.0009102, NM-254E, Lab#=61414-25, Argus VI
A	0.1	4.39559	0.0042732	0.00988716	3.84618	119.396	99.9394	75.6159	75.0607	0.181299
B	3	4.36783	0.0062141	0.0309	1.24029	82.1042	99.7994	100	74.4931	0.116972
Integrated age ± 1s			n=2		5.08647	107.491			74.923	0.16691
Plateau ± 1s		steps A-B	n=2	MSWD=6.92	5.08647	110.303±26.369		100	74.6599	0.274177
CM-SS4, Sanidine, J=0.009546±0.12%, IC=1.058206±0.0009102, NM-254E, Lab#=61414-26, Argus VI
A	0.1	7.18162	0.0837334	-1.7894	0.0899469	6.0932	107.562	2.76706	130.102	5.08803
B	3	6.04783	0.0012194	0.0238	3.16069	418.406	99.8846	100	102.493	0.0490176
Integrated age ± 1s			n=2		3.25063	145.66			103.261	0.180668
Step B			N=1		3.161			97.2	102.493	0.0490176
CM-SS4, Sanidine, J=0.009546±0.12%, IC=1.058206±0.0009102, NM-254E, Lab#=61414-27, Argus VI
A	0.1	4.49212	0.0046334	0.0276	4.92997	110.114	99.8248	73.6638	76.592	0.142904
B	3	4.47248	0.0078447	0.0577	1.76256	65.0381	99.629	100	76.117	0.0874965
Integrated age ± 1s			n=2		6.69253	93.1173			76.4683	0.142354
Plateau ± 1s		steps A-B	n=2	MSWD=8.04	6.69253	98.243±31.874		100	76.2466	0.231103
CM-SS4, Sanidine, J=0.009546±0.12%, IC=1.058206±0.0009102, NM-254E, Lab#=61414-31, Argus VI
A	0.1	4.38276	0.0034542	0.0246	4.87386	147.705	99.8385	52.8991	74.7716	0.245361
B	3	4.35084	0.0035292	0.0104	4.33965	144.566	99.9346	100	74.307	0.0363615
Integrated age ± 1s			n=2		9.21351	146.21			74.5535	0.159145
Plateau ± 1s		steps A-B	n=2	MSWD=3.51	9.21351	146.227±2.220		100	74.3169	0.11306
CM-SS4, Sanidine, J=0.009546±0.12%, IC=1.058206±0.0009102, NM-254E, Lab#=61414-32, Argus VI
A	0.1	11.8934	0.0043957	-0.00261398	2.13572	116.069	100.01	26.5408	196.742	0.761287
B	3	11.7188	0.0022549	0.00638285	5.9112	226.265	99.9853	100	193.955	0.0594778
Integrated age ± 1s			n=2		8.04692	180.725			194.695	0.308179
Plateau ± 1s		steps A-B	n=2	MSWD=13.32	8.04692	197.018±77.920		100	193.972	0.315418
CM-SS4, Sanidine, J=0.009546±0.12%, IC=1.058206±0.0009102, NM-254E, Lab#=61414-33, Argus VI
A	0.1	4.8884	0.0047142	-0.00152167	5.23679	108.227	100.016	38.234	83.3651	0.15317
B	3	4.85113	0.0049859	0.00391707	8.45989	102.329	99.9842	100	82.7168	0.0223169
Integrated age ± 1s			n=2		13.6967	104.507			82.9647	0.117527
Step B			n=1		8.45989			61.766	82.7168	0.0223169
CM-SS4, Sanidine, J=0.009546±0.12%, IC=1.058206±0.0009102, NM-254E, Lab#=61414-34, Argus VI
A	0.1	4.21571	0.0071017	-0.0973	0.466933	71.8425	100.713	1.85024	72.5897	0.860775
B	3	4.37387	0.0042614	0.00398283	24.7693	119.727	99.9807	100	74.727	0.010473
Integrated age ± 1s			n=2		25.2363	118.268			74.6874	0.0931976
Plateau ± 1s		steps A-B	n=2	MSWD=6.16	25.2363	118.841±33.859		100	74.7266	0.0949087
CM-SS4, Sanidine, J=0.009546±0.12%, IC=1.058206±0.0009102, NM-254E, Lab#=61414-35, Argus VI
A	0.1	4.46614	0.0039504	0.0346	2.71499	129.152	99.7733	57.4896	76.1188	0.193716
B	3	4.47943	0.0043149	0.0136	2.00759	118.242	99.9166	100	76.4483	0.0709128
Integrated age ± 1s			n=2		4.72258	124.278			76.2601	0.148122
Plateau ± 1s		steps A-B	n=2	MSWD=2.55	4.72258	124.515±7.715		100	76.4094	0.141488
CM-SS4, Sanidine, J=0.009546±0.12%, IC=1.058206±0.0009102, NM-254E, Lab#=61414-36, Argus VI
A	0.1	4.50844	0.0025106	0.00191536	2.14552	203.22	99.9909	7.80968	76.9901	0.274181
B	3	4.46802	0.0055829	0.00317931	25.3271	91.3869	99.9889	100	76.3114	0.0108168
Integrated age ± 1s			n=2		27.4726	95.4913			76.3645	0.0961479
Plateau ± 1s		steps A-B	n=2	MSWD=6.12	27.4726	100.121±79.078		100	76.3124	0.0969351
CM-SS4, Sanidine, J=0.009546±0.12%, IC=1.058206±0.0009102, NM-254E, Lab#=61414-37, Argus VI
A	0.1	3.97839	0.0122134	-0.2947	0.636277	41.7741	102.234	9.60159	69.5878	0.703445
B	3	4.34467	0.0032472	0.00466428	5.99051	157.121	99.9736	100	74.2319	0.0296927
Integrated age ± 1s			n=2		6.62679	124.195			73.7855	0.117012
Step B			n=1		5.99051			90.3984	74.2319	0.0296927
CM-SS4, Sanidine, J=0.009546±0.12%, IC=1.058206±0.0009102, NM-254E, Lab#=61414-38, Argus VI
A	0.1	4.42705	0.0061424	-0.00473762	4.58734	83.0626	100.044	68.0519	75.6655	0.172102
B	3	4.46015	0.004714	0.1188	2.15361	108.232	99.2126	100	75.6001	0.0674909
Integrated age ± 1s			n=2		6.74095	89.7292			75.646	0.15057
Plateau ± 1s		steps A-B	n=2	MSWD=0.13	6.74095	91.104±17.797		100	75.6088	0.111684
CM-SS4, Sanidine, J=0.009546±0.12%, IC=1.058206±0.0009102, NM-254E, Lab#=61414-39, Argus VI
A	0.1	4.17591	0.0033388	-0.00619962	1.75573	152.811	100.052	17.7295	71.4539	0.451016
B	3	4.06908	0.0032819	0.0051859	8.14719	155.46	99.9685	100	69.5995	0.023121
Integrated age ± 1s			n=2		9.90292	154.984			69.9285	0.117669
Step B			n=1		8.14719			82.2705	69.5995	0.023121
CM-SS4, Sanidine, J=0.009546±0.12%, IC=1.058206±0.0009102, NM-254E, Lab#=61414-40, Argus VI
A	0.1	3.86369	0.0046756	0.0296	0.973068	109.121	99.78	8.72009	66.0199	0.133406
B	0.15	4.14896	0.0025304	0.00199228	5.66849	201.63	99.9901	59.5179	70.9573	0.0339374
C	0.3	4.16458	0.0017303	0.0177	4.51737	294.864	99.876	100	71.1401	0.0354507
Integrated age ± 1s			n=3		11.1589	213.158			70.6017	0.0899304
Plateau ± 1s		steps B-C	n=2	MSWD=13.87	10.1859	242.979±65.927		91.2799	71.0447	0.126021
CM-SS4, Sanidine, J=0.009546±0.12%, IC=1.058206±0.0009102, NM-254E, Lab#=61414-41, Argus VI
A	0.1	4.49207	0.0064368	-0.00326632	5.10531	79.2636	100.034	52.1251	76.7482	0.238758
B	3	4.44315	0.0055502	0.0101	4.68902	91.9253	99.9422	100	75.8599	0.0361603
Integrated age ± 1s			n=2		9.79433	84.8591			76.323	0.155904
Step B			n=1		4.68902			47.8749	75.8599	0.0361603
CM-SS4, Sanidine, J=0.009546±0.12%, IC=1.058206±0.0009102, NM-254E, Lab#=61414-42, Argus VI
A	0.1	4.3527	0.0026849	0.0203	2.04345	190.027	99.8653	39.4685	74.2875	0.402035
B	3	4.38403	0.0039943	0.0323	3.13397	127.733	99.7873	100	74.7553	0.0519938
Integrated age ± 1s			n=2		5.17742	146.717			74.5718	0.185944
Plateau ± 1s		steps A-B	n=2	MSWD=1.33	5.17742	152.320±44.049		100	74.7476	0.108979
CM-SS4, Sanidine, J=0.009546±0.12%, IC=1.058206±0.0009102, NM-254E, Lab#=61414-43, Argus VI
A	0.1	3.82938	0.0154192	0.033	0.0516183	33.0889	99.725	7.82353	65.4077	7.81496
B	3	4.51773	0.0033253	0.1116	0.608165	153.431	99.2707	100	76.6014	0.244718
Integrated age ± 1s			n=2		0.659783	119.444			75.7326	0.676512
Plateau ± 1s		steps A-B	n=2	MSWD=2.05	0.659783	144.016±85.095		100	76.5905	0.362448
CM-SS4, Sanidine, J=0.009546±0.12%, IC=1.058206±0.0009102, NM-254E, Lab#=61414-44, Argus VI
A	0.1	4.31499	0.0021405	-0.000314544	1.53944	238.357	100.006	24.3207	73.757	0.348449
B	3	4.37902	0.0035237	0.0123	4.79032	144.792	99.9225	100	74.7706	0.0326145
Integrated age ± 1s			n=2		6.32976	160.074			74.5245	0.127024
Plateau ± 1s		steps A-B	n=2	MSWD=8.39	6.32976	167.548±66.161		100	74.7618	0.131087
CM-SS4, Sanidine, J=0.009546±0.12%, IC=1.058206±0.0009102, NM-254E, Lab#=61414-45, Argus VI
A	0.1	5.60328	0.313384	0.7047	0.0156525	1.62805	96.9953	1.25572	92.4776	23.5823
B	3	4.41763	0.003832	0.0661	1.23085	133.143	99.5625	100	75.1514	0.116367
Integrated age ± 1s			n=2		1.2465	66.0894			75.3725	0.308819
Plateau ± 1s		steps A-B	n=2	MSWD=0.54	1.2465	131.492±92.995		100	75.1519	0.148209
CM-SS4, Sanidine, J=0.009546±0.12%, IC=1.058206±0.0009102, NM-254E, Lab#=61414-46, Argus VI
A	0.1	7.91159	0.0039884	0.4964	0.336591	127.922	98.1284	5.60166	130.739	1.52499
B	3	4.80068	0.0031781	0.00776424	5.67219	160.537	99.9567	100	81.852	0.0316544
Integrated age ± 1s			n=2		6.00878	158.275			84.6268	0.126865
Step B			n=1		5.67219			94.3983	81.852	0.0316544
CM-SS4, Sanidine, J=0.009546±0.12%, IC=1.058206±0.0009102, NM-254E, Lab#=61414-47, Argus VI
A	0.1	4.40337	0.0042615	0.0388	3.80248	119.724	99.7461	54.9728	75.0486	0.268217
B	3	4.36069	0.0051126	0.00664312	3.11455	99.7935	99.963	100	74.4929	0.0529828
Integrated age ± 1s			n=2		6.91703	109.846			74.7994	0.17464
Plateau ± 1s		steps A-B	n=2	MSWD=4.13	6.91703	110.750±14.093		100	74.5138	0.139461
CM-SS4, Sanidine, J=0.009546±0.12%, IC=1.058206±0.0009102, NM-254E, Lab#=61414-48, Argus VI
A	0.1	4.47894	0.0061938	0.3856	0.373788	82.3733	97.4335	5.17592	74.5788	0.965339
B	3	4.37284	0.0041063	0.00251574	6.8479	124.249	99.9904	100	74.7168	0.0264976
Integrated age ± 1s			n=2		7.22169	121.063			74.7105	0.106921
Plateau ± 1s		steps A-B	n=2	MSWD=0.02	7.22169	122.082±29.611		100	74.7167	0.0950322
CM-SS4, Sanidine, J=0.009546±0.12%, IC=1.058206±0.0009102, NM-254E, Lab#=61414-51, Argus VI
A	0.1	4.46538	0.0061759	0.0104	4.22347	82.6121	99.9416	23.3666	76.2319	0.262459
B	3	4.41715	0.0041707	0.00516202	13.8513	122.331	99.9728	100	75.4468	0.0157961
Integrated age ± 1s			n=2		18.0748	109.975			75.6305	0.111274
Step B			n=1		13.8513			76.6334	75.4468	0.0157961
CM-SS4, Sanidine, J=0.009546±0.12%, IC=1.058206±0.0009102, NM-254E, Lab#=61414-52, Argus VI
A	0.1	4.45207	0.0060322	-0.0385	2.51425	84.5801	100.269	67.5556	76.2525	0.240283
B	3	4.44349	0.0046234	-0.0166	1.2075	110.353	100.12	100	75.998	0.112759
Integrated age ± 1s			n=2		3.72175	91.5146			76.1686	0.190262
Plateau ± 1s		steps A-B	n=2	MSWD=0.92	3.72175	92.942±18.224		100	76.044	0.137992
CM-SS4, Sanidine, J=0.009546±0.12%, IC=1.058206±0.0009102, NM-254E, Lab#=61414-53, Argus VI
A	0.1	43.1664	0.0081257	0.000683037	2.9855	62.7889	100.001	32.7227	631.528	1.35259
B	3	14.3591	0.0074351	0.00835531	6.13812	68.621	99.9868	100	234.987	0.0625549
Integrated age ± 1s			n=2		9.12362	66.597			374.425	0.513207
No Plateau
CM-SS4, Sanidine, J=0.009546±0.12%, IC=1.058206±0.0009102, NM-254E, Lab#=61414-54, Argus VI
A	0.1	4.36261	-0.0093938	0.0955	0.267564	-	99.3442	5.16781	74.0722	1.4229
B	3	4.36801	0.0041575	0.00455196	4.90994	122.719	99.9766	100	74.6256	0.0349181
Integrated age ± 1s			n=2		5.17751	147.578			74.5973	0.12166
Plateau ± 1s		steps A-B	n=2	MSWD=0.15	5.17751	122.719±0.000		100	74.6253	0.097612
CM-SS4, Sanidine, J=0.009546±0.12%, IC=1.058206±0.0009102, NM-254E, Lab#=61414-55, Argus VI
A	0.1	4.39965	0.0031334	0.022	2.36227	162.828	99.8571	63.3362	75.0681	0.242879
B	3	4.39414	0.0002286	0.0218	1.36746	2231.86	99.85	100	74.9704	0.107087
Integrated age ± 1s			n=2		3.72973	246.666			75.0332	0.182993
Plateau ± 1s		steps A-B	n=2	MSWD=0.14	3.72973	921.414±1463.029		100	74.9863	0.134126
CM-SS4, Sanidine, J=0.009546±0.12%, IC=1.058206±0.0009102, NM-254E, Lab#=61414-56, Argus VI
A	0.1	4.43711	0.0049834	0.00155821	2.50192	102.381	99.9984	57.5133	75.8004	0.188902
B	3	4.49243	0.0057503	0.0459	1.84824	88.7265	99.7056	100	76.5076	0.0779942
Integrated age ± 1s			n=2		4.35016	96.0975			76.1017	0.14664
Plateau ± 1s		steps A-B	n=2	MSWD=11.97	4.35016	96.579±9.655		100	76.4046	0.266325
CM-SS4, Sanidine, J=0.009546±0.12%, IC=1.058206±0.0009102, NM-254E, Lab#=61414-57, Argus VI
A	0.1	3.02405	-0.0408658	-2.5036	0.00885472	-	124.995	0.358712	64.714	33.8937
B	3	43.8077	0.0010361	0.045	2.45962	492.427	99.9694	100	639.275	0.270788
Integrated age ± 1s			n=2		2.46847	576.01			637.506	0.929161
Plateau ± 1s		steps A-B	n=2	MSWD=287.35	2.46847	492.427±0.000		100	639.238	4.63908
CM-SS4, Sanidine, J=0.009546±0.12%, IC=1.058206±0.0009102, NM-254E, Lab#=61414-58, Argus VI
A	0.1	4.39395	0.0127499	0.2119	0.324712	40.0163	98.5803	3.66611	74.0337	1.10398
B	3	4.3241	0.0052277	0.00795996	8.5324	97.5963	99.9549	100	73.8734	0.0214968
Integrated age ± 1s			n=2		8.85711	92.7063			73.8799	0.100978
Plateau ± 1s		steps A-B	n=2	MSWD=0.02	8.85711	95.485±40.715		100	73.8735	0.0927806
CM-SS4, Sanidine, J=0.009546±0.12%, IC=1.058206±0.0009102, NM-254E, Lab#=61414-59, Argus VI
A	0.1	4.65875	0.0015596	0.0478	2.2505	327.138	99.698	63.9495	79.2784	0.316961
B	3	4.43296	0.0047657	0.02	1.26868	107.058	99.8727	100	75.6376	0.11577
Integrated age ± 1s			n=2		3.51918	187.89			77.9682	0.225347
Step B			n=1		1.26868			36.0505	75.6376	0.11577
CM-SS4, Sanidine, J=0.009546±0.12%, IC=1.058206±0.0009102, NM-254E, Lab#=61414-60, Argus VI
A	0.1	4.41355	0.0045774	-0.0375	0.624874	111.462	100.257	15.2513	75.5962	0.582934
B	3	4.33416	0.0033084	0.00469322	3.47231	154.215	99.9725	100	74.0549	0.0414276
Integrated age ± 1s			n=2		4.09719	145.69			74.2901	0.131158
Plateau ± 1s		steps A-B	n=2	MSWD=6.96	4.09719	147.694±30.231		100	74.0626	0.141653
CM-SS4, Sanidine, J=0.009546±0.12%, IC=1.058206±0.0009102, NM-254E, Lab#=61414-61, Argus VI
A	0.1	4.50561	0.0736729	-1.3664	0.0578624	6.92526	109.203	1.4898	83.8752	5.67916
B	3	4.45661	0.0072675	0.00122178	3.82605	70.2035	100.005	100	76.1323	0.0411973
Integrated age ± 1s			n=2		3.88391	61.7918			76.247	0.130293
Plateau ± 1s		steps A-B	n=2	MSWD=1.86	3.88391	69.261±44.744		100	76.1327	0.10861
CM-SS4, Sanidine, J=0.009546±0.12%, IC=1.058206±0.0009102, NM-254E, Lab#=61414-62, Argus VI
A	0.1	4.53264	0.0040164	-0.0474	1.7924	127.03	100.318	36.3118	77.6432	0.346765
B	3	4.45526	0.007757	0.00597589	3.14373	65.7734	99.9735	100	76.0862	0.0494411
Integrated age ± 1s			n=2		4.93613	79.7356			76.6512	0.159008
Step B			n=1		3.14373			63.6882	76.0862	0.0494411
CM-SS4, Sanidine, J=0.009546±0.12%, IC=1.058206±0.0009102, NM-254E, Lab#=61414-63, Argus VI
A	0.1	3.86894	0.0116357	0.0124	2.34699	43.8482	99.9275	38.4075	66.2043	0.0575339
B	0.15	3.86648	0.0109062	0.0148	1.55874	46.7811	99.9078	63.9156	66.1501	0.0835392
C	0.3	3.87914	0.0130975	-0.0123	1.40859	38.9543	100.122	86.9666	66.5033	0.0936126
D	0.5	3.92654	0.0121247	0.0763	0.302833	42.0797	99.4459	91.9224	66.8563	0.403857
E	3	3.9056	0.0133009	0.0172	0.493604	38.3586	99.8948	100	66.8004	0.24504
Integrated age ± 1s			n=5		6.11076	42.7117			66.3403	0.0936543
Plateau ± 1s		steps A-E	n=5	MSWD=4.09	6.11076	42.9 ±3.5		100	66.2735	0.116648
CM-SS4, Sanidine, J=0.009546±0.12%, IC=1.058206±0.0009102, NM-254E, Lab#=61414-65, Argus VI
A	0.1	4.04422	0.0047813	-0.012	0.0233326	106.708	100.08	1.37893	69.2574	13.8428
B	3	4.37985	0.0055483	0.00877233	1.66874	91.9568	99.9519	100	74.8061	0.0888776
Integrated age ± 1s			n=2		1.69208	92.1321			74.7298	0.230739
Plateau ± 1s		steps A-B	n=2	MSWD=0.16	1.69208	92.160±10.431		100	74.8059	0.127467
CM-SS4, Sanidine, J=0.009546±0.12%, IC=1.058206±0.0009102, NM-254E, Lab#=61414-67, Argus VI
A	0.1	11.3855	0.0030639	0.0187	2.80127	166.521	99.9523	79.714	188.65	0.563976
B	3	11.7879	0.0040995	-0.00875999	0.712879	124.455	100.025	100	195.113	0.277368
Integrated age ± 1s			n=2		3.51415	155.835			189.963	0.508043
No Plateau
CM-SS4, Sanidine, J=0.009546±0.12%, IC=1.058206±0.0009102, NM-254E, Lab#=61414-68, Argus VI
A	0.1	4.39962	0.0037793	-0.00240071	3.15785	135	100.025	62.2172	75.191	0.181545
B	3	4.38024	0.0025336	-3.84513e-05	1.91768	201.375	100.005	100	74.8511	0.0807682
Integrated age ± 1s			n=2		5.07552	154.206			75.0624	0.148368
Plateau ± 1s		steps A-B	n=2	MSWD=2.93	5.07552	160.078±46.935		100	74.9073	0.155916
CM-SS4, Sanidine, J=0.009546±0.12%, IC=1.058206±0.0009102, NM-254E, Lab#=61414-69, Argus VI
A	0.1	39.8934	0.0025295	0.1017	1.58175	201.702	99.9248	38.4875	590.182	2.72121
B	3	53.2316	0.0022937	0.0318	2.52802	222.437	99.9825	100	751.919	0.298716
Integrated age ± 1s			n=2		4.10978	213.97			691.352	1.40382
Plateau ± 1s		no plateau
CM-SS4, Sanidine, J=0.009546±0.12%, IC=1.058206±0.0009102, NM-254E, Lab#=61414-70, Argus VI
A	0.1	9.67506	0.0083644	-0.0145	1.28389	60.9971	100.051	25.1502	161.654	0.629479
B	3	9.69903	0.0021863	0.00546782	3.821	233.364	99.9849	100	161.935	0.056981
Integrated age ± 1s			n=2		5.10489	136.415			161.864	0.253307
Plateau ± 1s		steps A-B	n=2	MSWD=0.20	5.10489	190.013±121.882		100	161.933	0.201356
CM-SS4, Sanidine, J=0.009546±0.12%, IC=1.058206±0.0009102, NM-254E, Lab#=61414-71, Argus VI
A	0.1	65.3668	0.0187431	0.6244	0.0814346	27.2209	99.7171	4.47292	885.515	21.7555
B	3	69.5468	-2.18e-05	0.019	1.73918	-	99.9918	100	931.871	0.469262
Integrated age ± 1s			n=2		1.82061				929.824	1.43018
Plateau ± 1s		no plateau
CM-SS4, Sanidine, J=0.009546±0.12%, IC=1.058206±0.0009102, NM-254E, Lab#=61414-73, Argus VI
A	0.1	15.9525	0.0386513	1.0768	0.0479469	13.2002	98.0331	1.3545	254.584	13.6212
B	3	10.7356	0.0012239	0.00735632	3.49187	416.867	99.9802	100	178.429	0.0640009
Integrated age ± 1s			n=2		3.53982	294.762			179.483	0.26612
Step B			n=1		3.49187			98.6455	178.429	0.0640009
CM-SS4, Sanidine, J=0.009546±0.12%, IC=1.058206±0.0009102, NM-254E, Lab#=61414-74, Argus VI
A	0.1	4.43213	0.0048166	0.0601	2.50995	105.926	99.6016	55.4434	75.4226	0.366206
B	3	4.36392	0.004417	0.00133876	2.0171	115.509	99.9997	100	74.5738	0.0732876
Integrated age ± 1s			n=2		4.52705	109.992			75.0459	0.2242
Plateau ± 1s		steps A-B	n=2	MSWD=5.17	4.52705	110.196±6.776		100	74.6065	0.18703
CM-SS4, Sanidine, J=0.009546±0.12%, IC=1.058206±0.0009102, NM-254E, Lab#=61414-77, Argus VI
A	0.1	9.23331	0.0213087	0.099	1.59598	23.9435	99.6988	69.5707	154.05	0.69724
B	3	9.19982	0.0238093	0.1797	0.698061	21.4288	99.4397	100	153.131	0.263056
Integrated age ± 1s			n=2		2.29405	23.1179			153.775	0.523819
Plateau ± 1s		steps A-B	n=2	MSWD=1.52	2.29405	23.178±1.778		100	153.245	0.354608
CM-SS4, Sanidine, J=0.009546±0.12%, IC=1.058206±0.0009102, NM-254E, Lab#=61414-78, Argus VI
A	0.1	6.26877	0.0365321	-0.1535	0.0604644	13.9659	100.814	3.74948	107.098	7.34293
B	3	4.48047	0.0078008	0.0476	1.55215	65.4041	99.699	100	76.303	0.0989286
Integrated age ± 1s			n=2		1.61261	57.4679			77.4682	0.282362
Step B			n=1		1.55215			96.2505	76.303	0.0989286
CM-SS4, Sanidine, J=0.009546±0.12%, IC=1.058206±0.0009102, NM-254E, Lab#=61414-79, Argus VI
A	0.1	4.3911	0.0044828	-0.0118	1.29779	113.814	100.09	67.9109	75.0963	0.427732
B	3	4.3698	0.0048049	0.0168	0.613226	106.184	99.8963	100	74.5969	0.232757
Integrated age ± 1s			n=2		1.91101	111.248			74.9357	0.31248
Plateau ± 1s		steps A-B	n=2	MSWD=1.05	1.91101	111.365±5.395		100	74.711	0.228677
CM-SS4, Sanidine, J=0.009546±0.12%, IC=1.058206±0.0009102, NM-254E, Lab#=61414-80, Argus VI
A	0.1	4.56305	0.0016041	0.0224	1.06379	318.062	99.8567	33.9581	77.8023	0.573819
B	3	5.10415	0.006065	0.0119	2.06886	84.1227	99.9402	100	86.8998	0.07483
Integrated age ± 1s			n=2		3.13265	112.129			83.8162	0.234825
Step B			n=1		2.06886			66.0419	86.8998	0.07483
CM-SS4, Sanidine, J=0.009546±0.12%, IC=1.058206±0.0009102, NM-254E, Lab#=61414-81, Argus VI
A	0.1	4.30669	0.0186384	0.0771	0.212682	27.3738	99.4969	5.83359	73.2514	1.82506
B	3	4.39942	0.0062548	0.014	3.43314	81.57	99.9155	100	75.1075	0.0445828
Integrated age ± 1s			n=2		3.64582	73.1245			75	0.146932
Plateau ± 1s		steps A-B	n=2	MSWD=1.03	3.64582	78.408±38.322		100	75.1064	0.102314
CM-SS4, Sanidine, J=0.009546±0.12%, IC=1.058206±0.0009102, NM-254E, Lab#=61414-82, Argus VI
A	0.1	4.17182	0.0623418	1.0402	0.104161	8.18398	92.6669	2.83703	66.2125	3.42193
B	0.15	4.38915	0.0060073	-0.0094407	2.52131	84.9307	100.076	71.5097	75.0532	0.111507
C	3	4.42572	0.0024466	-0.00358601	1.04602	208.536	100.03	100	75.6326	0.163111
Integrated age ± 1s			n=3		3.67149	77.4078			74.9689	0.162828
Plateau ± 1s		steps B-C	n=2	MSWD=8.60	3.56733	121.174±87.402		97.163	75.2377	0.285181
CM-SS4, Sanidine, J=0.009546±0.12%, IC=1.058206±0.0009102, NM-254E, Lab#=61414-84, Argus VI
A	0.1	11.7865	0.0010164	0.0852	3.53509	501.972	99.7849	74.8943	194.646	0.408456
B	3	11.7653	-0.0044464	0.0187	1.18501	-	99.9501	100	194.619	0.193463
Integrated age ± 1s			n=2		4.72011	-1436.85			194.642	0.385814
Plateau ± 1s		steps A-B	n=2	MSWD=0.00	4.72011	375.948±0.000		100	194.624	0.289043
CM-SS4, Sanidine, J=0.009546±0.12%, IC=1.058206±0.0009102, NM-254E, Lab#=61414-85, Argus VI
A	0.1	11.9452	0.0096955	-0.00698734	1.69722	52.6228	100.023	38.334	197.582	1.01408
B	3	11.6963	0.001634	0.0593	2.73023	312.242	99.8499	100	193.351	0.1062
Integrated age ± 1s			n=2		4.42745	107.996			194.976	0.452712
Plateau ± 1s		steps A-B	n=2	MSWD=17.21	4.42745	212.720±183.579		100	193.397	0.494353
CM-SS4, Sanidine, J=0.009546±0.12%, IC=1.058206±0.0009102, NM-254E, Lab#=61414-86, Argus VI
A	0.1	22.3516	0.0100513	-0.1276	0.595312	50.76	100.175	75.3543	354.468	2.14416
B	3	31.7782	0.0147062	0.118	0.194705	34.6931	99.8923	100	484.411	1.84716
Integrated age ± 1s			n=2		0.790017	45.5599			387.357	1.83542
Plateau ± 1s		no plateau
CM-SS4, Sanidine, J=0.009546±0.12%, IC=1.058206±0.0009102, NM-254E, Lab#=61414-87, Argus VI
A	0.1	8.80699	0.0037732	0.0318	0.759621	135.218	99.8949	19.0394	147.486	0.936116
B	3	77.7443	0.0051102	0.032	3.23012	99.8403	99.9882	100	1015.97	0.30704
Integrated age ± 1s			n=2		3.98974	105.074			879.337	1.21366
Plateau ± 1s		no plateau
SJ-SS5, Sanidine, J=0.0095555±0.07%, IC=1.05962±0.0011331, NM-254D, Lab#=61405-04, Argus VI
A	0.11	4.59458	0.0055271	0.00317002	1.57103	92.3095	99.9904	47.3233	78.5087	0.268813
B	3	4.57232	0.009434	-0.0098766	1.74875	54.0814	100.082	100	78.2058	0.181951
Integrated age ± 1s			n=2		3.31978	67.2636			78.3489	0.166898
Plateau ± 1s		steps A-B	n=2	MSWD=0.87	3.31978			100	78.301	0.15921
SJ-SS5, Sanidine, J=0.0095555±0.07%, IC=1.05962±0.0011331, NM-254D, Lab#=61405-05, Argus VI
A	0.11	4.39747	-0.0316705	0.3007	0.214277	-	97.901	6.21044	73.661	1.81252
B	3	4.34058	0.0030926	-0.000573032	3.23599	164.976	100.01	100	74.2619	0.0998435
Integrated age ± 1s			n=2		3.45027	546.398			74.2253	0.153935
Plateau ± 1s		steps A-B	n=2	MSWD=0.11	3.45027			100	74.2601	0.111002
SJ-SS5, Sanidine, J=0.0095555±0.07%, IC=1.05962±0.0011331, NM-254D, Lab#=61405-06, Argus VI
A	0.11	4.38269	0.003413	0.0618	1.78068	149.488	99.5871	52.8565	74.6586	0.243367
B	3	4.37315	0.0008958	-0.0121	1.58822	569.551	100.085	100	74.8638	0.202163
Integrated age ± 1s			n=2		3.3689	229.17			74.7564	0.167012
Plateau ± 1s		steps A-B	n=2	MSWD=0.42	3.3689			100	74.78	0.16309
SJ-SS5, Sanidine, J=0.0095555±0.07%, IC=1.05962±0.0011331, NM-254D, Lab#=61405-07, Argus VI
A	0.11	36.7531	0.0028203	0.0435	4.71208	180.904	99.9654	92.3503	550.691	0.293751
B	3	53.4374	-0.0003337	0.0152	0.390317	-	99.9918	100	754.973	1.89025
Integrated age ± 1s			n=2		5.10239				567.151	0.444791
Plateau ± 1s		no plateau
SJ-SS5, Sanidine, J=0.0095555±0.07%, IC=1.05962±0.0011331, NM-254D, Lab#=61405-08, Argus VI
A	0.11	4.54688	0.0707397	0.1208	0.0999944	7.21241	99.3374	2.9438	77.2159	4.04026
B	3	4.44519	0.0072324	0.00409798	3.29678	70.5442	99.9855	100	76.0005	0.0974781
Integrated age ± 1s			n=2		3.39677	56.0541			76.0365	0.159319
Plateau ± 1s		steps A-B	n=2	MSWD=0.09	3.39677			100	76.0012	0.109499
SJ-SS5, Sanidine, J=0.0095555±0.07%, IC=1.05962±0.0011331, NM-254D, Lab#=61405-10, Argus VI
A	0.11	4.45539	-0.0045782	0.00381195	0.486455	-	99.9672	36.3598	76.1573	0.865591
B	3	4.53721	-0.0014952	0.4409	0.851438	-	97.0976	100	75.3489	0.46331
Integrated age ± 1s			n=2		1.33789				75.6547	0.432549
Plateau ± 1s		steps A-B	n=2	MSWD=0.68	1.33789			100	75.529	0.411481
SJ-SS5, Sanidine, J=0.0095555±0.07%, IC=1.05962±0.0011331, NM-254D, Lab#=61405-11, Argus VI
A	0.11	4.58427	0.0097016	-0.0478	1.80543	52.5897	100.331	48.4094	78.5974	0.22866
B	3	4.59332	0.0065755	0.0225	1.92407	77.5917	99.8651	100	78.3914	0.167594
Integrated age ± 1s			n=2		3.72951	63.075			78.4906	0.149191
Plateau ± 1s		steps A-B	n=2	MSWD=0.53	3.72951			100	78.4634	0.144659
SJ-SS5, Sanidine, J=0.0095555±0.07%, IC=1.05962±0.0011331, NM-254D, Lab#=61405-12, Argus VI
A	0.11	4.59056	0.0061257	-0.00467418	2.34628	83.2891	100.042	52.7191	78.4809	0.172581
B	3	4.59262	0.0065974	-0.00108265	2.10425	77.3341	100.02	100	78.4985	0.15322
Integrated age ± 1s			n=2		4.45054	80.3633			78.489	0.126912
Plateau ± 1s		steps A-B	n=2	MSWD=0.01	4.45054			100	78.4907	0.125636
SJ-SS5, Sanidine, J=0.0095555±0.07%, IC=1.05962±0.0011331, NM-254D, Lab#=61405-13, Argus VI
A	0.11	5.8538	0.0020368	0.0718	3.26782	250.493	99.6371	47.1271	99.1445	0.154898
B	3	5.82334	0.0024982	0.0287	3.66624	204.229	99.8566	100	98.8532	0.0913287
Integrated age ± 1s			n=2		6.93406	223.701			98.9924	0.108587
Plateau ± 1s		steps A-B	n=2	MSWD=2.62	6.93406			100	98.9283	0.142884
SJ-SS5, Sanidine, J=0.0095555±0.07%, IC=1.05962±0.0011331, NM-254D, Lab#=61405-14, Argus VI
A	0.11	4.39434	-0.0029771	-0.0882	0.732045	-	100.595	27.9177	75.5952	0.565527
B	3	4.36774	0.0033546	0.00608264	1.89011	152.091	99.9643	100	74.6848	0.169113
Integrated age ± 1s			n=2		2.62215	321.503			74.9382	0.204678
Plateau ± 1s		steps A-B	n=2	MSWD=2.38	2.62215			100	74.7596	0.254667
SJ-SS5, Sanidine, J=0.0095555±0.07%, IC=1.05962±0.0011331, NM-254D, Lab#=61405-16, Argus VI
A	0.11	13.5028	8.55e-05	0.0318	3.80587	5967.3	99.9302	58.4275	221.869	0.226583
B	3	15.611	0.0010635	0.0562	2.70797	479.74	99.8932	100	254.137	0.153167
Integrated age ± 1s			n=2		6.51384	1036.79			235.355	0.211734
Plateau ± 1s		no plateau
SJ-SS5, Sanidine, J=0.0095555±0.07%, IC=1.05962±0.0011331, NM-254D, Lab#=61405-17, Argus VI
A	0.11	4.42954	0.0008359	0.00632828	3.34048	610.365	99.959	44.0526	75.7179	0.13207
B	3	4.42019	0.0033021	0.00775521	4.24246	154.509	99.9537	100	75.5572	0.0770162
Integrated age ± 1s			n=2		7.58293	230.265			75.6282	0.0876456
Plateau ± 1s		steps A-B	n=2	MSWD=1.10	7.58293			100	75.5979	0.0857833
SJ-SS5, Sanidine, J=0.0095555±0.07%, IC=1.05962±0.0011331, NM-254D, Lab#=61405-18, Argus VI
A	0.11	4.34274	0.0087238	-0.0156	1.74995	58.4841	100.124	49.0734	74.3813	0.224962
B	3	4.35722	-0.0001658	0.0523	1.81603	-	99.6426	100	74.2731	0.180802
Integrated age ± 1s			n=2		3.56598	121.575			74.3269	0.151412
Plateau ± 1s		steps A-B	n=2	MSWD=0.14	3.56598			100	74.3155	0.149155
SJ-SS5, Sanidine, J=0.0095555±0.07%, IC=1.05962±0.0011331, NM-254D, Lab#=61405-19, Argus VI
A	0.11	46.7807	0.0243255	0.2098	0.352969	20.974	99.8709	14.6388	675.552	3.39224
B	3	86.2583	-0.0002927	0.034	2.05822	-	99.9882	100	1100.25	0.511562
Integrated age ± 1s			n=2		2.41118	154.084			1043.91	0.966032
Plateau ± 1s		no plateau
SJ-SS5, Sanidine, J=0.0095555±0.07%, IC=1.05962±0.0011331, NM-254D, Lab#=61405-21, Argus VI
A	0.11	4.36655	0.0078123	0.1102	0.707588	65.3078	99.2591	13.1881	74.1488	0.569764
B	3	4.34643	0.0041956	0.000898606	4.65776	121.605	100.002	100	74.3547	0.0700387
Integrated age ± 1s			n=2		5.36535	109.19			74.3281	0.108058
Plateau ± 1s		steps A-B	n=2	MSWD=0.13	5.36535			100	74.3516	0.0849773
SJ-SS5, Sanidine, J=0.0095555±0.07%, IC=1.05962±0.0011331, NM-254D, Lab#=61405-23, Argus VI
A	0.11	4.4384	0.0052773	0.0274	2.06242	96.679	99.8255	36.0684	75.7673	0.203634
B	3	4.45048	0.0009701	0.00601456	3.65565	525.929	99.9617	100	76.0712	0.0890909
Integrated age ± 1s			n=2		5.71806	202.172			75.9621	0.105287
Plateau ± 1s		steps A-B	n=2	MSWD=1.87	5.71806			100	76.0223	0.122242
SJ-SS5, Sanidine, J=0.0095555±0.07%, IC=1.05962±0.0011331, NM-254D, Lab#=61405-24, Argus VI
A	0.11	4.47592	0.0042318	-0.0255	2.03539	120.564	100.179	59.0065	76.6607	0.205742
B	3	4.74635	0.0078794	-0.00329715	1.41404	64.7516	100.034	100	81.0849	0.227374
Integrated age ± 1s			n=2		3.44943	89.0867			78.4748	0.161548
Plateau ± 1s		steps B-B	n=1	MSWD=0.00	1.41404			40.9935	81.0849	0.227374
SJ-SS5, Sanidine, J=0.0095555±0.07%, IC=1.05962±0.0011331, NM-254D, Lab#=61405-25, Argus VI
A	0.11	4.39532	0.0025595	0.0675	1.45506	199.337	99.5469	42.9488	74.8401	0.288089
B	3	4.38969	0.0026616	-0.00701721	1.93283	191.691	100.054	100	75.1193	0.165811
Integrated age ± 1s			n=2		3.38789	194.902			75.0004	0.16295
Plateau ± 1s		steps A-B	n=2	MSWD=0.71	3.38789			100	75.0498	0.151937
SJ-SS5, Sanidine, J=0.0095555±0.07%, IC=1.05962±0.0011331, NM-254D, Lab#=61405-26, Argus VI
A	0.11	9.86942	0.0164126	0.0525	1.08712	31.0861	99.855	50.7038	164.611	0.461977
B	3	9.87892	0.0057519	0.00365924	1.05694	88.7018	99.9939	100	164.981	0.326504
Integrated age ± 1s			n=2		2.14407	45.7283			164.795	0.302745
Plateau ± 1s		steps A-B	n=2	MSWD=0.43	2.14407			100	164.858	0.28684
SJ-SS5, Sanidine, J=0.0095555±0.07%, IC=1.05962±0.0011331, NM-254D, Lab#=61405-27, Argus VI
A	0.11	4.33061	0.0035497	0.0319	1.65924	143.732	99.7871	51.2334	73.9328	0.190256
B	3	4.38897	0.0057077	0.0516	1.57935	89.3887	99.6595	100	74.8171	0.205409
Integrated age ± 1s			n=2		3.23859	110.864			74.3658	0.147691
Plateau ± 1s		steps A-B	n=2	MSWD=9.98	3.23859			100	74.3412	0.443555
SJ-SS5, Sanidine, J=0.0095555±0.07%, IC=1.05962±0.0011331, NM-254D, Lab#=61405-28, Argus VI
A	0.11	84.0397	-0.001895	0.0782	2.01342	-	99.9722	88.2456	1078.73	0.976154
B	3	49.7207	0.0125578	0.1958	0.26819	40.6285	99.885	100	710.8	2.80441
Integrated age ± 1s			n=2		2.28161				1039.12	1.08341
Plateau ± 1s		no plateau
SJ-SS5, Sanidine, J=0.0095555±0.07%, IC=1.05962±0.0011331, NM-254D, Lab#=61405-29, Argus VI
A	0.11	87.3511	0.0025764	0.032	3.23068	198.03	99.9893	46.7023	1110.71	0.74184
B	3	93.3855	7.09e-05	0.0213	3.68692	7196.11	99.9932	100	1167.39	0.2981
Integrated age ± 1s			n=2		6.9176	411.114			1141.14	0.68808
Plateau ± 1s		no plateau
SJ-SS5, Sanidine, J=0.0095555±0.07%, IC=1.05962±0.0011331, NM-254D, Lab#=61405-30, Argus VI
A	0.11	64.853	0.0010468	0.0302	2.21001	487.394	99.9862	58.7263	882.561	0.825592
B	3	65.1004	0.006053	-0.00235361	1.55322	84.2894	100.002	100	885.342	0.543332
Integrated age ± 1s			n=2		3.76323	163.893			883.71	0.711821
Plateau ± 1s		no plateau
SJ-SS5, Sanidine, J=0.0095555±0.07%, IC=1.05962±0.0011331, NM-254D, Lab#=61405-31, Argus VI
A	0.11	11.8334	-0.003764	0.0246	0.964219	-	99.9363	30.1858	195.848	0.58957
B	3	11.7087	0.0003878	0.0235	2.23006	1315.64	99.9406	100	193.896	0.167567
Integrated age ± 1s			n=2		3.19428				194.487	0.245597
Plateau ± 1s		steps A-B	n=2	MSWD=10.14	3.19428			100	194.042	0.527899
SJ-SS5, Sanidine, J=0.0095555±0.07%, IC=1.05962±0.0011331, NM-254D, Lab#=61405-32, Argus VI
A	0.11	4.33931	0.004263	0.0175	3.03271	119.682	99.8879	95.1103	74.1519	0.104955
B	3	4.34698	-0.0125803	-0.0686	0.155915	-	100.443	100	74.6843	2.04261
Integrated age ± 1s			n=2		3.18863				74.1784	0.149002
Plateau ± 1s		steps A-B	n=2	MSWD=0.07	3.18863			100	74.1533	0.115598
SJ-SS5, Sanidine, J=0.0095555±0.07%, IC=1.05962±0.0011331, NM-254D, Lab#=61405-33, Argus VI
A	0.11	27.0743	0.0029385	0.0236	1.55891	173.627	99.9751	26.7283	420.966	0.594172
B	3	62.7972	0.0015797	0.0247	4.27353	322.975	99.9885	100	860.24	0.233602
Integrated age ± 1s			n=2		5.83245	262.601			752.761	0.506305
Plateau ± 1s		no plateau
SJ-SS5, Sanidine, J=0.0095555±0.07%, IC=1.05962±0.0011331, NM-254D, Lab#=61405-34, Argus VI
A	0.11	37.7023	0.0032374	0.0922	1.11558	157.597	99.9277	62.7585	562.751	1.18101
B	3	44.1447	-0.0033287	0.0428	0.661997	-	99.9705	100	643.966	0.996985
Integrated age ± 1s			n=2		1.77758				593.422	0.914343
Plateau ± 1s		no plateau
SJ-SS5, Sanidine, J=0.0095555±0.07%, IC=1.05962±0.0011331, NM-254D, Lab#=61405-38, Argus VI
A	0.11	9.97342	-0.0049189	0.1306	0.205301	-	99.6066	15.2403	165.873	2.26076
B	3	9.72674	0.008827	0.00658898	1.14179	57.8004	99.9873	100	162.537	0.303423
Integrated age ± 1s			n=2		1.34709				163.047	0.43986
Plateau ± 1s		steps A-B	n=2	MSWD=2.14	1.34709			100	162.596	0.452012
SJ-SS5, Sanidine, J=0.0095555±0.07%, IC=1.05962±0.0011331, NM-254D, Lab#=61405-39, Argus VI
A	0.11	4.37858	-0.004517	0.1926	0.471371	-	98.682	11.995	73.9252	0.914937
B	3	4.30659	0.0040763	0.0608	3.45834	125.164	99.5883	100	73.3864	0.0961916
Integrated age ± 1s			n=2		3.92971				73.4541	0.146238
Plateau ± 1s		steps A-B	n=2	MSWD=0.34	3.92971			100	73.3923	0.107147
SJ-SS5, Sanidine, J=0.0095555±0.07%, IC=1.05962±0.0011331, NM-254D, Lab#=61405-40, Argus VI
A	0.11	11.9345	-0.0021853	0.3673	0.475872	-	99.0811	17.104	195.833	1.16156
B	3	11.7572	-0.0018906	0.0182	2.30636	-	99.9528	100	194.68	0.161095
Integrated age ± 1s			n=2		2.78223				194.881	0.268842
Plateau ± 1s		steps A-B	n=2	MSWD=0.97	2.78223			100	194.702	0.202021
SJ-SS5, Sanidine, J=0.0095555±0.07%, IC=1.05962±0.0011331, NM-254D, Lab#=61405-43, Argus VI
A	0.11	62.3536	-8.64e-05	0.2026	2.06344	-	99.9031	66.3305	854.801	1.04422
B	3	65.8018	0.004847	0.3293	1.0474	105.262	99.8515	100	891.827	0.828001
Integrated age ± 1s			n=2		3.11084	324.013			867.358	0.883034
Plateau ± 1s		no plateau
SJ-SS5, Sanidine, J=0.0095555±0.07%, IC=1.05962±0.0011331, NM-254D, Lab#=61405-44, Argus VI
A	0.11	68.8991	0.017426	-0.0666	0.810928	29.2783	100.031	63.1605	926.073	2.27239
B	3	52.5079	0	0.0394	0.472988	-	99.978	100	744.095	1.54365
Integrated age ± 1s			n=2		1.28392	46.3553			861.118	1.56759
Plateau ± 1s		no plateau
SJ-SS5, Sanidine, J=0.0095555±0.07%, IC=1.05962±0.0011331, NM-254D, Lab#=61405-45, Argus VI
A	0.11	51.817	0.003122	0.00915589	2.48242	163.422	99.9952	58.3419	736.136	0.662953
B	3	54.189	-0.0021378	-0.00346725	1.77253	-	100.002	100	763.716	0.447645
Integrated age ± 1s			n=2		4.25496				747.676	0.596958
Plateau ± 1s		no plateau
SJ-SS5, Sanidine, J=0.0095555±0.07%, IC=1.05962±0.0011331, NM-254D, Lab#=61405-46, Argus VI
A	0.11	40.3445	0.0190308	0.5286	0.25937	26.8094	99.6149	22.6406	594.812	4.42934
B	3	57.0202	0.0039009	0.2106	0.886226	130.791	99.8907	100	795.344	0.901037
Integrated age ± 1s			n=2		1.1456				751.835	1.43618
Plateau ± 1s		no plateau
SJ-SS5, Sanidine, J=0.0095555±0.07%, IC=1.05962±0.0011331, NM-254D, Lab#=61405-47, Argus VI
A	0.11	8.4903	0.0092457	-0.0646	0.696896	55.1828	100.237	14.2873	142.986	0.68926
B	3	10.4996	0.0033078	0.0159	4.18083	154.243	99.9574	100	174.814	0.0884143
Integrated age ± 1s			n=2		4.87773				170.3	0.169556
Plateau ± 1s		no plateau
SJ-SS5, Sanidine, J=0.0095555±0.07%, IC=1.05962±0.0011331, NM-254D, Lab#=61405-49, Argus VI
A	0.11	22.1018	-0.0005827	-0.0109	3.09781	-	100.014	90.1497	350.665	0.362172
B	3	26.982	0.0127792	-0.1061	0.338485	39.9246	100.121	100	420.233	1.44364
Integrated age ± 1s			n=2		3.4363				357.636	0.417368
Plateau ± 1s		no plateau
SJ-SS5, Sanidine, J=0.0095555±0.07%, IC=1.05962±0.0011331, NM-254D, Lab#=61405-50, Argus VI
A	0.11	87.7328	-2.29e-05	-0.0303	0.433776	-	100.01	18.1262	1114.52	4.50789
B	3	115.957	0.0027689	0.00716571	1.95932	184.262	99.9984	100	1365.02	0.650713
Integrated age ± 1s			n=2		2.39309				1322.08	1.2313
Plateau ± 1s		no plateau
SJ-SS5, Sanidine, J=0.0095555±0.07%, IC=1.05962±0.0011331, NM-254D, Lab#=61405-51, Argus VI
A	0.11	25.8348	0.0054259	0.5219	0.201114	94.0312	99.3993	10.0522	401.576	4.29626
B	3	61.6653	8.41e-05	0.0292	1.79959	6066.63	99.9859	100	847.807	0.486886
Integrated age ± 1s			n=2		2.0007	821.551			807.563	0.95865
Plateau ± 1s		no plateau
SJ-SS6, Sanidine, J=0.0095337±0.08%, IC=1.05325±0.0019241, NM-254D, Lab#=61406-03, Argus VI
A	0.1	4.44012	0.268123	-0.4854	0.0933562	1.90287	103.765	1.1103	78.5624	6.145
B	0.15	3.98041	0.002662	0.0127	4.25344	191.662	99.9113	51.6973	67.9833	0.0760688
C	0.3	3.99406	0.0027365	0.0433	2.35451	186.444	99.6821	79.7	68.059	0.144303
D	0.6	4.02796	0.0068252	0.0374	1.70685	74.753	99.7377	100	68.665	0.178588
Integrated age ± 1s			n=4		8.40816	78.7846			67.2763	0.107788
Plateau ± 1s		steps A-D	n=4	MSWD=5.09	8.40816			100	68.0836	0.152476
SJ-SS6, Sanidine, J=0.0095337±0.08%, IC=1.05325±0.0019241, NM-254D, Lab#=61406-04, Argus VI
B	0.15	4.52507	-0.127605	0.3873	0.123659	-	97.2407	1.90888	75.0848	5.04488
C	3	3.97863	0.0036184	0.00942292	6.35441	141.003	99.9374	100	67.9709	0.0271718
Integrated age ± 1s			n=2		6.47807				67.1246	0.111103
Plateau ± 1s		steps B-C	n=2	MSWD=1.99	6.47807			100	67.9711	0.0672597
SJ-SS6, Sanidine, J=0.0095337±0.08%, IC=1.05325±0.0019241, NM-254D, Lab#=61406-06, Argus VI
B	0.15	3.68562	-0.060159	-0.5973	0.101485	-	104.75	3.08921	66.0193	5.50126
C	0.3	3.97221	0.0037798	0.000371109	2.6962	134.982	100.006	85.1615	67.9086	0.0805762
D	0.6	3.95891	-0.098857	-0.2909	0.296355	-	101.979	94.1825	68.9905	2.06804
E	3	4.07022	0.0208911	0.5461	0.191115	24.4221	96.0577	100	66.8604	1.06742
Integrated age ± 1s			n=4		3.28516				66.9066	0.268314
Plateau ± 1s		steps B-E	n=4	MSWD=0.45	3.28516			100	67.9039	0.0974401
SJ-SS6, Sanidine, J=0.0095337±0.08%, IC=1.05325±0.0019241, NM-254D, Lab#=61406-07, Argus VI
B	0.15	4.70662	0.170733	1.2392	0.0565911	2.98832	92.4348	1.98844	74.2746	11.0764
C	3	4.3296	0.0021645	0.0161	2.78942	235.714	99.8916	100	73.8261	0.237061
Integrated age ± 1s			n=2		2.84601	92.4829			72.7712	0.319277
Plateau ± 1s		steps B-C	n=2	MSWD=0.00	2.84601			100	73.8263	0.24447
SJ-SS6, Sanidine, J=0.0095337±0.08%, IC=1.05325±0.0019241, NM-254D, Lab#=61406-08, Argus VI
B	0.15	4.39612	0.0946356	-0.7894	0.217847	5.39125	105.542	4.00217	79.0933	2.73414
C	3	4.35951	0.0030506	-0.0137	5.22536	167.247	100.099	100	74.4784	0.14154
Integrated age ± 1s			n=2		5.44321	75.9663			73.5838	0.180806
Plateau ± 1s		steps B-C	n=2	MSWD=2.84	5.44321			100	74.4907	0.245818
SJ-SS6, Sanidine, J=0.0095337±0.08%, IC=1.05325±0.0019241, NM-254D, Lab#=61406-09, Argus VI
B	0.15	4.35926	0.0429439	0.0331	0.440149	11.8807	99.8411	6.92353	74.2879	1.51238
C	3	4.36197	0.01107	0.00136169	5.91714	46.0889	100.01	100	74.4551	0.106929
Integrated age ± 1s			n=2		6.35729	38.428			73.3692	0.153696
Plateau ± 1s		steps B-C	n=2	MSWD=0.01	6.35729			100	74.4543	0.122599
SJ-SS6, Sanidine, J=0.0095337±0.08%, IC=1.05325±0.0019241, NM-254D, Lab#=61406-10, Argus VI
A	0.11	4.53005	-0.416622	-1.678	0.0268368	-	110.15	0.719984	84.8996	23.7138
B	0.15	4.33908	0.0036982	0.1532	0.405196	137.96	98.9669	11.5907	73.3137	1.53814
C	3	4.37521	0.0079669	-0.00075109	3.29538	64.0405	100.022	100	74.6854	0.197688
Integrated age ± 1s			n=3		3.72741				73.5332	0.295433
Plateau ± 1s		steps A-C	n=3	MSWD=0.48	3.72741			100	74.6638	0.205224
SJ-SS6, Sanidine, J=0.0095337±0.08%, IC=1.05325±0.0019241, NM-254D, Lab#=61406-12, Argus VI
A	0.15	3.98469	0.002892	-0.00702897	1.54258	176.419	100.06	18.9606	68.1546	0.186575
C	0.25	3.98388	0.0190361	0.2329	0.0784476	26.8019	98.2962	19.9248	66.9624	2.56898
D	3	3.97785	0.0040273	0.0213	6.5147	126.686	99.8483	100	67.8984	0.0375482
Integrated age ± 1s			n=3		8.13573	128.944			66.9581	0.0750206
Plateau ± 1s		steps A-D	n=3	MSWD=0.97	8.13573			100	67.9082	0.0663704
SJ-SS6, Sanidine, J=0.0095337±0.08%, IC=1.05325±0.0019241, NM-254D, Lab#=61406-13, Argus VI
A	0.15	5.67019	0.0087035	0.3073	0.791157	58.6206	98.3975	64.2055	94.7349	0.987861
B	3	5.78334	0.0212877	-0.0426	0.441068	23.9671	100.254	100	98.3536	1.63754
Integrated age ± 1s			n=2		1.23223	38.6286			94.6521	0.849134
Plateau ± 1s		steps A-B	n=2	MSWD=3.58	1.23223			100	95.7004	1.60241
SJ-SS6, Sanidine, J=0.0095337±0.08%, IC=1.05325±0.0019241, NM-254D, Lab#=61406-14, Argus VI
A	0.15	117.059	0.005878	0.0586	3.10795	86.7989	99.9856	96.6938	1371.81	1.7234
B	3	122.671	0.0726159	0.4227	0.106268	7.02606	99.9043	100	1416.76	33.9858
Integrated age ± 1s			n=2		3.21422	63.1088			1353.5	2.1214
Plateau ± 1s		steps A-B	n=2	MSWD=1.74	3.21422			100	1371.93	2.40888
SJ-SS6, Sanidine, J=0.0095337±0.08%, IC=1.05325±0.0019241, NM-254D, Lab#=61406-15, Argus VI
A	0.15	4.32983	0.0055761	0.0255	7.5015	91.4984	99.8365	58.4673	73.7904	0.116576
B	3	4.33463	0.0035742	0.00912173	5.32875	142.746	99.9458	100	73.9497	0.133274
Integrated age ± 1s			n=2		12.8302	107.532			72.7912	0.104596
Plateau ± 1s		steps A-B	n=2	MSWD=0.81	12.8302	112.783±36.238		100	73.8594	0.106282
SJ-SS6, Sanidine, J=0.0095337±0.08%, IC=1.05325±0.0019241, NM-254D, Lab#=61406-16, Argus VI
A	0.15	5.43735	1.16799	2.0136	0.0299305	0.436823	90.6543	0.688373	84.0064	21.1359
B	3	4.4388	0.0076528	0.0214	4.31808	66.6689	99.8707	100	75.6384	0.16361
Integrated age ± 1s			n=2		4.34801	32.6078			74.6049	0.221136
Plateau ± 1s		steps A-B	n=2	MSWD=0.16	4.34801			100	75.6389	0.174742
SJ-SS6, Sanidine, J=0.0095337±0.08%, IC=1.05325±0.0019241, NM-254D, Lab#=61406-21, Argus VI
A	0.15	4.33877	0.0235135	0.0757	0.261465	21.6983	99.5908	9.71607	73.7624	2.63115
B	3	4.36982	0.0088928	0.0443	2.42959	57.3727	99.7154	100	74.371	0.264449
Integrated age ± 1s			n=2		2.69106	49.4701			73.2408	0.348001
Plateau ± 1s		steps A-B	n=2	MSWD=0.05	2.69106			100	74.3649	0.269961
SJ-SS6, Sanidine, J=0.0095337±0.08%, IC=1.05325±0.0019241, NM-254D, Lab#=61406-22, Argus VI
A	0.15	4.68457	0.13271	0.5834	0.106748	3.84452	96.5345	5.09298	77.1419	6.08469
B	3	4.59386	-0.0050626	0.00908053	1.98923	-	99.9334	100	78.2772	0.26744
Integrated age ± 1s			n=2		2.09598				77.0919	0.398155
Plateau ± 1s		steps A-B	n=2	MSWD=0.03	2.09598			100	78.275	0.27462
SJ-SS6, Sanidine, J=0.0095337±0.08%, IC=1.05325±0.0019241, NM-254D, Lab#=61406-23, Argus VI
A	0.15	4.1566	0.0064379	0.1818	0.885802	79.2501	98.7066	15.5021	70.1021	0.694637
B	3	3.99044	0.003996	0.00900921	4.82829	127.679	99.9407	100	68.1716	0.0338569
Integrated age ± 1s			n=2		5.71409	116.63			67.4842	0.121916
Step B			n-1		4.82829			84.5	68.1716	0.0338569
SJ-SS6, Sanidine, J=0.0095337±0.08%, IC=1.05325±0.0019241, NM-254D, Lab#=61406-24, Argus VI
A	0.15	4.0095	0.0106316	-0.0172	1.32553	47.9894	100.149	11.4808	68.6324	0.214297
B	3	3.97492	0.0027769	0.00653894	10.2201	183.731	99.9562	100	67.9212	0.0174193
Integrated age ± 1s			n=2		11.5456	138.691			67.0216	0.0615128
Step B			n=1		10.2201			88.5	67.9212	0.0174193
SJ-SS6, Sanidine, J=0.0095337±0.08%, IC=1.05325±0.0019241, NM-254D, Lab#=61406-25, Argus VI
A	0.15	3.96484	0.0396283	0.0134	0.122159	12.8747	100.014	2.79186	67.7917	5.40081
B	3	3.97715	0.0046314	0.0132	4.25338	110.162	99.9122	100	67.9293	0.0380474
Integrated age ± 1s			n=2		4.37554	90.9701			66.9455	0.161576
Plateau ± 1s		steps A-B	n=2	MSWD=0.00	4.37554			100	67.9293	0.0670799
SJ-SS6, Sanidine, J=0.0095337±0.08%, IC=1.05325±0.0019241, NM-254D, Lab#=61406-26, Argus VI
A	0.15	3.97876	0.0028368	0.0136	3.23248	179.852	99.9047	96.2766	67.9512	0.0897093
B	3	4.51001	0.0594095	-0.9507	0.125013	8.58792	106.373	100	81.7238	4.9083
Integrated age ± 1s			n=2		3.35749	103.212			67.4768	0.200857
Plateau ± 1s		steps A-B	n=2	MSWD=7.87	3.35749			100	67.9558	0.257636
SJ-SS6, Sanidine, J=0.0095337±0.08%, IC=1.05325±0.0019241, NM-254D, Lab#=61406-27, Argus VI
A	0.15	3.98517	0.0041894	0.0112	3.24229	121.785	99.9247	63.6811	68.0723	0.0910242
B	3	3.99438	0.0039676	0.0518	1.84916	128.593	99.6184	100	68.0218	0.0839952
Integrated age ± 1s			n=2		5.09145	124.173			67.0728	0.0842674
Plateau ± 1s		steps A-B	n=2	MSWD=0.17	5.09145			100	68.045	0.0829028
SJ-SS6, Sanidine, J=0.0095337±0.08%, IC=1.05325±0.0019241, NM-254D, Lab#=61406-28, Argus VI
A	0.15	3.82039	0.0048084	-0.000494829	6.40965	106.107	100.014	56.242	65.3594	0.0473518
B	0.25	3.83796	0.0035116	0.00260555	1.01058	145.291	99.9898	65.1094	65.6393	0.129459
C	0.5	3.83311	-0.0001093	0.00674193	2.0934	-	99.9483	83.4781	65.5307	0.0710396
D	3	3.85657	0.0016921	0.0232	1.88292	301.521	99.8217	100	65.8435	0.0802802
Integrated age ± 1s			n=4		11.3966	155.775			64.5506	0.062471
Plateau ± 1s		steps A-D	n=4	MSWD=9.48	11.3966			100	65.5058	0.117805
SJ-SS6, Sanidine, J=0.0095337±0.08%, IC=1.05325±0.0019241, NM-254D, Lab#=61406-29, Argus VI
A	0.15	4.33705	0.0043158	0.00519944	3.19699	118.218	99.9721	68.5303	74.0094	0.239264
B	3	4.3693	-0.0027224	0.0105	1.46808	-	99.9228	100	74.5134	0.360665
Integrated age ± 1s			n=2		4.66507	242.843			73.0978	0.204393
Plateau ± 1s		steps A-B	n=2	MSWD=1.36	4.66507			100	74.1634	0.239881
SJ-SS6, Sanidine, J=0.0095337±0.08%, IC=1.05325±0.0019241, NM-254D, Lab#=61406-30, Argus VI
A	0.15	3.98316	0.0026194	0.0032716	3.70642	194.779	99.9829	51.4726	68.0775	0.0800973
B	3	4.00013	0.0061224	-0.00102481	3.49434	83.334	100.021	100	68.3886	0.0412488
Integrated age ± 1s			n=2		7.20076	118.121			67.2437	0.0707943
Plateau ± 1s		steps A-B	n=2	MSWD=11.93	7.20076			100	68.3234	0.138311
SJ-SS6, Sanidine, J=0.0095337±0.08%, IC=1.05325±0.0019241, NM-254D, Lab#=61406-33, Argus VI
A	0.15	4.28782	-0.0550312	-0.0194	0.407008	-	100.028	12.719	73.2219	1.45817
B	3	4.33651	0.0086179	-0.0148	2.79298	59.2028	100.118	100	74.1065	0.241034
Integrated age ± 1s			n=2		3.19999				72.9255	0.28152
Plateau ± 1s		steps A-B	n=2	MSWD=0.36	3.19999			100	74.083	0.245296
SJ-SS6, Sanidine, J=0.0095337±0.08%, IC=1.05325±0.0019241, NM-254D, Lab#=61406-34, Argus VI
A	0.15	3.96886	0.0628953	0.0842	0.169915	8.11196	99.5134	6.58394	67.5271	3.65727
B	3	4.00397	0.0062805	0.0249	2.41083	81.2362	99.8262	100	68.3221	0.061875
Integrated age ± 1s			n=2		2.58074	50.9789			67.2855	0.249343
Plateau ± 1s		steps A-B	n=2	MSWD=0.05	2.58074			100	68.3219	0.0831523
SJ-SS6, Sanidine, J=0.0095337±0.08%, IC=1.05325±0.0019241, NM-254D, Lab#=61406-36, Argus VI
A	0.15	4.9079	0.381731	-5.2427	0.0332221	1.33655	132.659	0.95493	110.088	21.7575
B	3	3.98972	0.0033557	-0.00224662	3.44579	152.041	100.024	100	68.2156	0.0455916
Integrated age ± 1s			n=2		3.47901	73.2009			67.6273	0.197258
Plateau ± 1s		steps A-B	n=2	MSWD=3.70	3.47901			100	68.2158	0.103806
SJ-SS6, Sanidine, J=0.0095337±0.08%, IC=1.05325±0.0019241, NM-254D, Lab#=61406-37, Argus VI
A	0.15	4.44223	0.0035757	-0.2012	0.737615	142.686	101.37	21.3197	76.8081	1.08
B	3	4.41138	0.006538	0.00412064	2.72216	78.0367	99.9848	100	75.2638	0.229253
Integrated age ± 1s			n=2		3.45978	86.3809			74.5003	0.29276
Plateau ± 1s		steps A-B	n=2	MSWD=1.96	3.45978			100	75.3304	0.319578
SJ-SS6, Sanidine, J=0.0095337±0.08%, IC=1.05325±0.0019241, NM-254D, Lab#=61406-38, Argus VI
A	0.15	3.97721	0.0082982	0.0268	0.7268	61.4837	99.8113	32.8143	67.863	0.599834
B	3	3.98811	0.0075829	0.00792717	1.48809	67.2835	99.96	100	68.1456	0.0942586
Integrated age ± 1s			n=2		2.21489	65.2632			67.0711	0.209911
Plateau ± 1s		steps A-B	n=2	MSWD=0.22	2.21489			100	68.1388	0.108357
SJ-SS6, Sanidine, J=0.0095337±0.08%, IC=1.05325±0.0019241, NM-254D, Lab#=61406-40, Argus VI
A	0.15	4.39658	0.0063637	-0.00469335	2.61872	80.1741	100.042	72.018	75.0582	0.28338
B	3	4.42769	0.0279169	-0.1432	1.01748	18.2758	101.013	100	76.2986	0.508438
Integrated age ± 1s			n=2		3.6362	41.1628			74.3153	0.251304
Plateau ± 1s		steps A-B	n=2	MSWD=4.54	3.6362			100	75.3522	0.531051
SJ-SS6, Sanidine, J=0.0095337±0.08%, IC=1.05325±0.0019241, NM-254D, Lab#=61406-41, Argus VI
A	0.15	3.83829	0.005519	0.0256	1.12879	92.445	99.814	11.2797	65.5316	0.268544
B	0.25	3.81931	0.0135377	0.0678	0.388186	37.6876	99.5065	15.1588	65.0155	0.357467
C	0.5	3.81541	0.002284	0.0104	3.56919	223.382	99.9247	50.8247	65.2178	0.0434753
D	3	3.82735	0.0042288	0.00177642	4.9211	120.65	99.9957	100	65.4645	0.0344908
Integrated age ± 1s			n=4		10.0073	126.233			64.4235	0.06577
Plateau ± 1s		steps A-D	n=4	MSWD=7.04	10.0073			100	65.3688	0.0888149
SJ-SS6, Sanidine, J=0.0095337±0.08%, IC=1.05325±0.0019241, NM-254D, Lab#=61406-42, Argus VI
A	0.15	4.37927	0.0204343	-0.00900883	1.61922	24.968	100.101	82.7992	74.8121	0.408089
B	3	4.52967	-0.0037633	-0.0355	0.33638	-	100.239	100	77.4352	1.69489
Integrated age ± 1s			n=2		1.9556				74.1764	0.441116
Plateau ± 1s		steps A-B	n=2	MSWD=2.26	1.9556			100	74.9558	0.600057
SJ-SS6, Sanidine, J=0.0095337±0.08%, IC=1.05325±0.0019241, NM-254D, Lab#=61406-43, Argus VI
A	0.15	4.40049	0.0184545	-0.026	1.81817	27.6466	100.211	98.7258	75.2485	0.369438
B	3	4.32232	0.150803	-4.1223	0.0234652	3.38324	129.175	100	94.7695	24.6126
Integrated age ± 1s			n=2		1.84164				74.4051	0.464708
Plateau ± 1s		steps A-B	n=2	MSWD=0.63	1.84164			100	75.2529	0.374412
Notes:
Isotopic ratios corrected for blank, radioactive decay, and mass discrimination, not corrected for interfering reactions.
Errors quoted for individual analyses include analytical error only, without interfering reaction or J uncertainties.
Integrated age calculated by summing isotopic measurements of all steps.
Integrated age error calculated by quadratically combining errors of isotopic measurements of all steps.
Plateau age is inverse-variance-weighted mean of selected steps.
Plateau age error is inverse-variance-weighted mean error (Taylor, 1982) times root MSWD where MSWD>1.
Isotopic abundances after Steiger and Jäger (1977).
Italicized sample ID denotes analyses excluded from plateau age calculations.
Ages calculated relative to FC-2 Fish Canyon Tuff sanidine interlaboratory standard at 28.201 Ma (Kuiper et al., 2008)
Decay Constant (LambdaK (total)) = 5.463e-10/a (Min et al., 2000)
